# Supplementary material
Source: MDPI journal article supplement (https://www.mdpi.com/2073-4352/6/5/61)

# Supplementary Materials: Colloidal Photonic Crystals Containing Silver Nanoparticles with Tunable Structural Colors

Chun-Feng Lai and Yu-Chi Wang

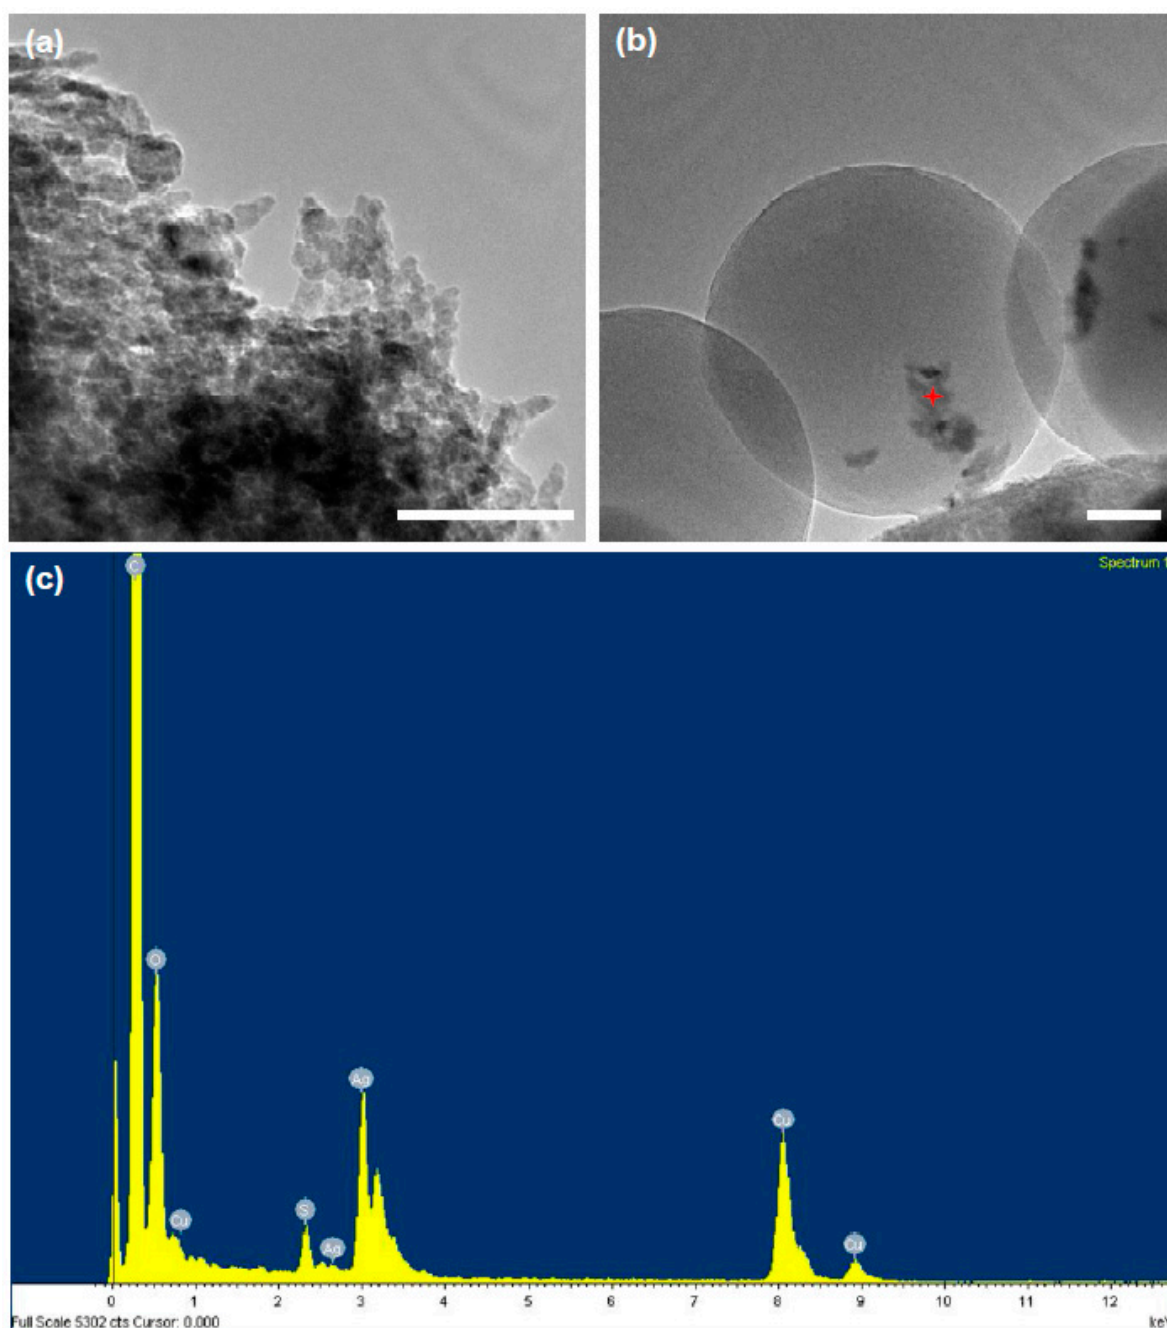

**Figure S1.** FETEM images of (a) AgNP agglomerates at 1.0 wt% concentration and (b) PS CPhC structures with 1.0 wt% AgNPs (sample C). (c) EDS compositional mapping (Ag) scans from the red cross point of image (b). All scale bars are 20 nm.

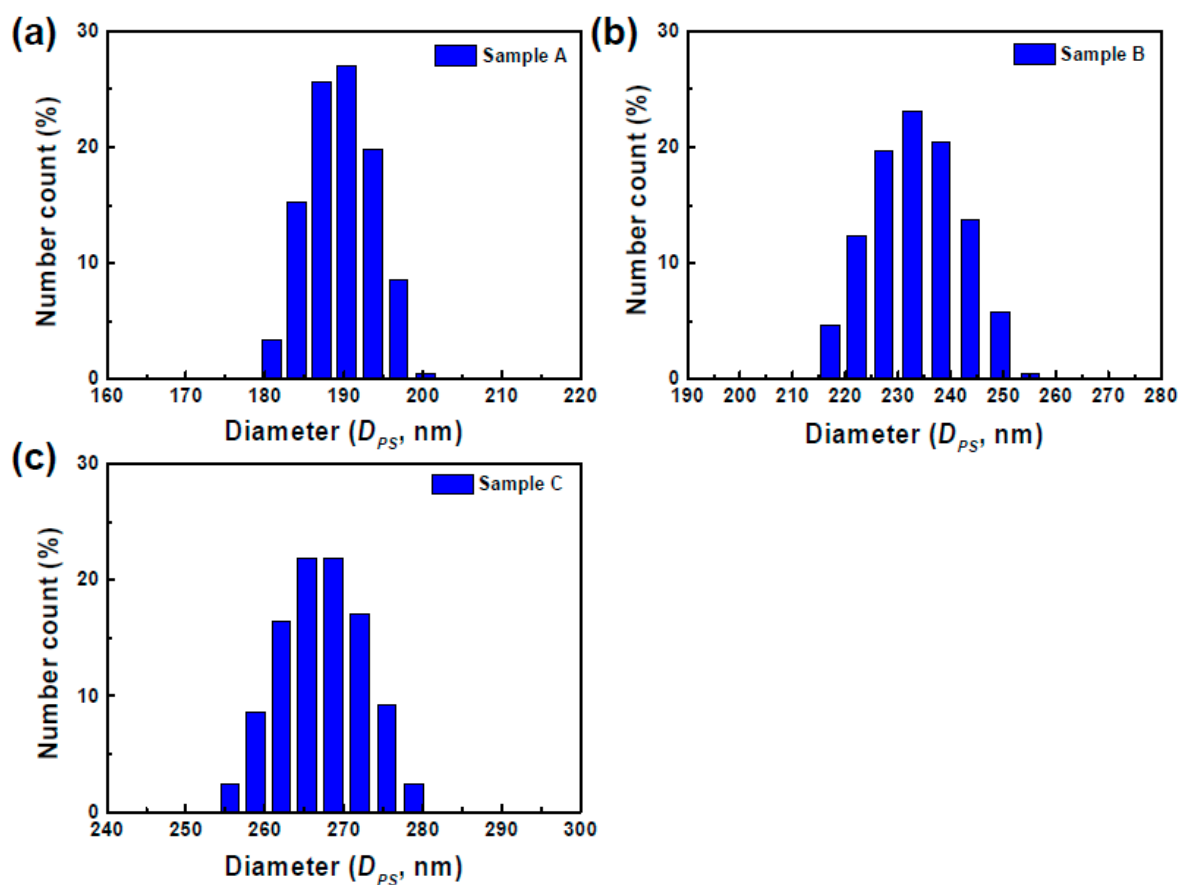

**Figure S2.** Diameter distribution of PS nanospheres prepared using (a) sample A, (b) sample B, and (c) sample C.

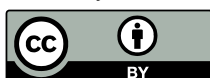

Supplement: s1 [file s1]
